# Supplementary material
Source: MDPI journal article supplement (https://www.mdpi.com/2073-4441/10/7/940)
Supplement: s1 [file s1]

## Supplementary material

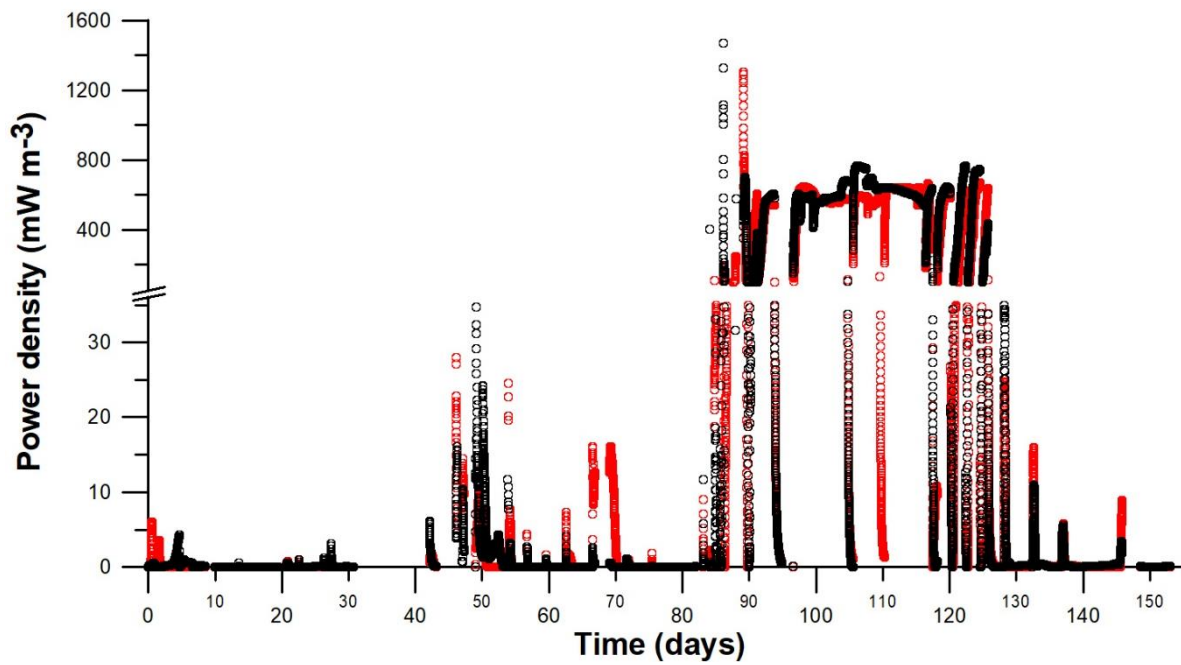

**Figure S1.** Performance CW-MFC during the four periods (152 days of operation). An increase in power density is observed from day 83 to day 124, when the anode potential was poised at  $-150$  mV vs Ag/AgCl. Each curve color represents the two tested CW-MFC reactors (duplicates).
